# Supplementary material for: Femoral condylar necrosis: treatment with hyperbaric oxygen therapy
Source: PubMed Central journal article supplement — Arthroplast Today. 2018 Sep 1;4(4):510–5. doi: 10.1016/j.artd.2018.02.010 (PMC6287235; doi:10.1016/j.artd.2018.02.010), 2018-09-01
Supplement: mmc4.pdf [file mmc4.pdf]

# INDIVIDUAL CONFLICT OF INTEREST STATEMENT

## *American Association of Hip and Knee Surgeons*

(Adopted from the American Academy of Orthopaedic Surgeons disclosure statement)

The following form **must be filled out completely and submitted by each author (example, 6 authors, 6 forms).**  
**All items require a response. If there is no relevant disclosure for a given item, enter "None."**

**Manuscript Title** Femoral Condylar Necrosis: Treatment with Hyperbaric Oxygen Therapy

1. Royalties from a company or supplier (The following conflicts were disclosed) None
2. Speakers bureau/paid presentations for a company or supplier (The following conflicts were disclosed) None
- 3A. Paid employee for a company or supplier (The following conflicts were disclosed) None
- 3B. Paid consultant for a company or supplier (The following conflicts were disclosed) None
- 3C. Unpaid consultants for a company or supplier (The following conflicts were disclosed) None
4. Stock or stock options in a company or supplier (The following conflicts were disclosed) None
5. Research support from a company or supplier as a Principal Investigator (The following conflicts were disclosed)  
None
6. Other financial or material support from a company or supplier (The following conflicts were disclosed) None
7. Royalties, financial or material support from publishers (The following conflicts were disclosed) None
8. Medical/Orthopaedic publications editorial/governing board (The following conflicts were disclosed) None
9. Board member/committee appointments for a society (The following conflicts were disclosed) None

**Each author must sign AND print or type his/her name, date and submit a separate form**

In addition, one BLINDED Conflict of Interest form (no author names used) should be submitted per manuscript with all author disclosures.

Daniele Manelli

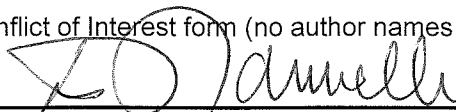

2017/10/16

Author Name (Print or Type)

Author Signature

Date
